# Supplementary material for: Identification and Verification of qGS11, a QTL Controlling Grain Size and Heading Date in Rice
Source: MDPI journal article supplement (doi:10.3390/agriculture12091384), 2022-09-03
Supplement: s1 [file s1]

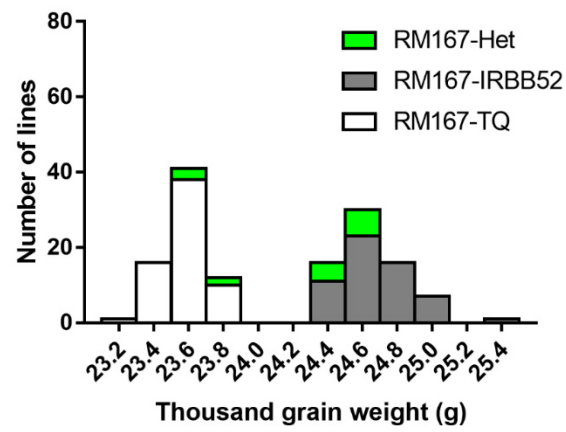

Figure S1. Frequency distribution of 140 individuals with extreme thousand grain weight in ZL1 population on the RM167 locus.
