# Supplementary material for: Identification and Verification of qGS11, a QTL Controlling Grain Size and Heading Date in Rice
Source: MDPI journal article supplement (doi:10.3390/agriculture12091384), 2022-09-03
Supplement: s1 [file s1]

Archive with 2 entries (2 files):
- Figure S1.pdf
- Tables S1 and S2.xlsx
