# Supplementary material for: Identification and Verification of qGS11, a QTL Controlling Grain Size and Heading Date in Rice
Source: MDPI journal article supplement (doi:10.3390/agriculture12091384), 2022-09-03
Supplement: s1 [file s1 › Tables S1 and S2.xlsx]

## Sheet: S1
Table S1. Two residual heterozygous plants used to produce the ZL1 and ZL2 populations
Line No.	Heterozygous	Trait value					Population
in Ti52-3	region	GL (mm)	GW (mm)	RLW	TGW (g)	HD (d)	produced
180	RM167-RM287	8.221	2.831	2.916	24.892	88.6667	ZL1
164	RM167-RM287	8.184	2.772	2.965	23.021	87.0455	ZL2

## Sheet: S2
Table S2. Polymorphic DNA markers used to map qGS11
Name	Physical position	Forward primer (5'-3')	Reverse primer (5'-3')	Segregation in the three populations
				ZL1	ZL2	NIL
RM167	4077127	GATCCAGCGTGAGGAACACGT	AGTCCGACCACAAGGTGCGTTGTC	√	√	√
EL5428	5428064	ATCTGTGTGAAAATAATGCAAG	TGTGAGATAACTGTAACCTGT	√	√	√
EL5538	5537745	ATAGGGAACACGATTTAGAGAGT	ACTGATCGCGTAATAGCCTT	√	√	×
EL6040	6040421	GATCAGAGGACCAACCTGCAT	CCCCTCTTCTCCGATGTGT	√	√	×
EL6510	6510230	TTTGTAAGGATTTTCGTTGGTG	TGCTCCTCCCGTGACAACTT	√	√	×
EL6969	6969232	TCCCCAGCAGTAAAACCTA	TGTAAGGAGTTGCCCACAT	√	√	×
EL7110	7109840	GCCCAACTGCTACAAGCTG	TTTCATGCCACCAAGTCCTGT	√	√	×
RM26694	16147655	GCGGCGCAAATCTTCGATCC	TCAGATCGCTCCCACCATACTCG	√	√	×
RM287	17233574	TTCCCTGTTAAGAGAGAAATC	GTGTATTTGGTGAAAGCAAC	√	√	×
